# Supplementary material
Source: Springer Nature journal article supplement (https://www.springermedizin.de/resource/supplementary/12879_2011_2064_MOESM2_ESM.pdf/9443402)
Supplement: MOESM2 [file 9443402]

## RespiFinder-SMART-22

sample preparation    preamplification    hybridization    ligation and PCR    measurement

Thermocycler    RotorGene Q

## RespiFinder-19

Sequencer handling

start device    calibration

sample preparation    preamplification    hybridization    ligation and PCR    measurement

Thermocycler

## RVP

Luminex handling

start device    calibration

sample preparation

RT-PCR    hybridization

Thermocycler

## nucleic acid extraction

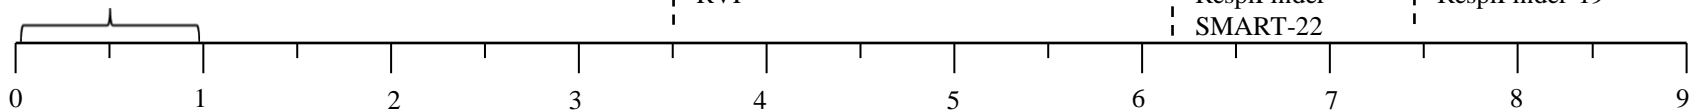

hands-on-time / time-to-result (hours)
